# Supplementary material for: Clinical features and outcome of influenza pneumonia in critically-ill immunocompromised patients
Source: PubMed Central journal article supplement (PMC9750560; doi:10.1097/md.0000000000032245), 2022-12-09
Supplement: medi-101-e32245-s001.pdf [file medi-101-e32245-s001.pdf]

## Supplemental Digital Content

**e-Table 1: Causes of immunosuppression**

|                                            | <b>n (%)</b> |
|--------------------------------------------|--------------|
| <b>Hematological malignancy</b>            | 16 (37.21%)  |
| Allogeneic stem cell transplantation       | 3            |
| Lymphoma                                   | 6            |
| Myeloma                                    | 4            |
| Acute leukemia                             | 1            |
| Myelodysplasia                             | 1            |
| Chronic myelomonocytic leukemia            | 1            |
| <b>Solid tumor</b>                         | 17 (39.53%)  |
| Lung                                       | 3            |
| Breast                                     | 3            |
| Liver                                      | 2            |
| ENT                                        | 2            |
| Others <sup>1</sup>                        | 7            |
| <b>Solid organ transplantation</b>         | 6 (13.95%)   |
| Kidney                                     | 5            |
| Liver                                      | 1            |
| <b>Immunosuppressive drugs or steroids</b> | 20 (46.51%)  |
| Treatment to prevent organ rejection       | 9            |
| Autoimmune or inflammatory disease         | 7            |
| Others <sup>2</sup>                        | 4            |
| <b>Primary immune deficiency</b>           | 1 (2.33%)    |

\*ENT : Ear, Nose and Throat

<sup>1</sup> Melanoma : n = 2, bladder : n = 1, kidney : n = 1, neuroendocrine : n = 1, prostate : n = 1, thymoma : n = 1

<sup>2</sup> Asthma : n = 3, multiple sclerosis : n = 1
