# Supplementary material for: Clinical features and outcome of influenza pneumonia in critically-ill immunocompromised patients
Source: PubMed Central journal article supplement (PMC9750560; doi:10.1097/md.0000000000032245), 2022-12-09
Supplement: medi-101-e32245-s002.pdf [file medi-101-e32245-s002.pdf]

## Supplemental Digital Content

**e-Table 2: Microbiological investigations**

|                                                                                 | Overall (n=137) | Immunocompromised (n=43) | Non-immunocompromised (n=94) | p-value |
|---------------------------------------------------------------------------------|-----------------|--------------------------|------------------------------|---------|
| <b>Number of respiratory samples collected, n (%)</b>                           | 86 (62,77%)     | 27 (62,79%)              | 59 (62,77%)                  | 1       |
| Sputum culture, n (%)                                                           | 32 (37,20%)     | 8 (29,63%)               | 24 (40,68%)                  | 0.721   |
| Bronchoalveolar lavage cultures or blind protected specimen brush distal, n (%) | 51 (59,3%)      | 19 (70,37%)              | 32 (54,24%)                  |         |
| Endotracheal aspiration, n (%)                                                  | 1 (1,16%)       | 0 (0%)                   | 1 (1,69%)                    |         |
| Pleural puncture, n (%)                                                         | 2 (2,33%)       | 0 (0%)                   | 2 (3,39%)                    | 0.565   |
| Samples collected before antibiotics, n (%)                                     | 17 (19,77%)     | 4 (14,81%)               | 13 (22,03%)                  |         |
| Number of samples with a positive culture, n (%)                                | 27 (31,40%)     | 7 (25,93%)               | 20 (33,90%)                  | 0.617   |
| <b>Positive antigenuria (n=114), n (%)</b>                                      | 14 (12,28%)     | 2 (5,88%)                | 12 (15%)                     | 0.224   |
| <i>Streptococcus pneumoniae</i>                                                 | 13 (11,4%)      | 2 (5,88%)                | 11 (13,75%)                  | 0.223   |
| <i>Legionella pneumophila</i>                                                   | 1 (0,88%)       | 0 (0%)                   | 1 (1,25%)                    | 0.241   |
| <b>Positive blood culture (n=129), n (%)</b>                                    | 13 (10,08%)     | 4 (10,26%)               | 9 (10%)                      | 1       |
