# Supplementary material for: Clinical features and outcome of influenza pneumonia in critically-ill immunocompromised patients
Source: PubMed Central journal article supplement (PMC9750560; doi:10.1097/md.0000000000032245), 2022-12-09
Supplement: medi-101-e32245-s003.pdf [file medi-101-e32245-s003.pdf]

## Supplemental Digital Content

**e-Table 3: Co-infections and ventilator associated pneumonia**

|                                                            | Overall<br>(n=137) | Immunocompromised<br>(n=43) | Non-<br>immunocompromised<br>(n=94) | p-value |
|------------------------------------------------------------|--------------------|-----------------------------|-------------------------------------|---------|
| <b>Bacterial co-infections, n (%)</b>                      | 50 (36,5%)         | 11 (25,6%)                  | 39 (41,5%)                          | 0.087   |
| <i>Streptococcus pneumoniae</i> , n (%)                    | 20 (14.6%)         | 4 (9.3%)                    | 15 (17%)                            |         |
| <i>Staphylococcus aureus</i> , n (%)                       | 9 (6.6%)           | 3 (7%)                      | 6 (6.4%)                            |         |
| <i>Streptococcus pyogenes</i> , n (%)                      | 5 (3.6%)           | 1 (2.3%)                    | 4 (4.3%)                            |         |
| <i>Haemophilus influenzae</i> , n (%)                      | 3 (2.2%)           | 0 (0%)                      | 3 (3.2%)                            |         |
| <i>Pseudomonas aeruginosa</i> , n (%)                      | 3 (2.2%)           | 3 (7%)                      | 0 (0%)                              |         |
| <i>Stenotrophomonas maltophilia</i> , n (%)                | 2 (1.5%)           | 0 (0%)                      | 2 (2.1%)                            |         |
| <i>Legionella pneumophila</i> , n (%)                      | 1 (0.7%)           | 0 (0%)                      | 1 (1.1%)                            |         |
| <i>Other gram-positive cocci*</i> , n (%)                  | 5 (3.7%)           | 1 (2.3%)                    | 4 (4.3%)                            |         |
| <i>Other gram-negative bacile<sup>+</sup></i> , n (%)      | 5 (3.7%)           | 1 (2,3%)                    | 4 (4.3%)                            |         |
| <b>Viral co-infections, n (%)</b>                          | 5 (3.7%)           | 2 (4.7%)                    | 3 (3.2%)                            | 0.649   |
| <b>Fungal infections, n (%)</b>                            | 2 (1.5%)           | 1 (2.3%)                    | 1 (1.1%)                            | 0.531   |
| <b>Ventilator associated pneumonia<br/>(n = 58), n (%)</b> | 13 (22,4%)         | 4 (22,2%)                   | 9 (22,5%)                           | 1       |
| <i>Pseudomonas aeruginosa</i> , n (%)                      | 4 (6.9%)           | 2 (11.1%)                   | 2 (5%)                              |         |
| <i>Enterococcus species</i> , n (%)                        | 3 (5.2%)           | 1 (5.6%)                    | 2 (5%)                              |         |
| <i>Staphylococcus aureus</i> , n (%)                       | 2 (3.5%)           | 0 (0%)                      | 2 (5%)                              |         |
| <i>E. Coli</i> , n (%)                                     | 2 (3.5%)           | 1 (5.6%)                    | 1 (2.5%)                            |         |
| <i>Other gram-negative bacile<sup>o</sup></i> , n (%)      | 7 (12.1%)          | 0 (0%)                      | 7 (17.5%)                           |         |
| <i>Other gram-positive cocci<sup>#</sup></i> , n (%)       | 1 (1.7%)           | 1 (5.6%)                    | 0 (0%)                              |         |

\* : *Streptococcus mitis* : n = 2, *Streptococcus aggalactiae* : n = 1, *Enterococcus faecalis* : n = 1, gram-positive cocci with missing identification : n = 1

+ : *Escherichia coli* : n = 2, *Moraxella catarrhalis* : n = 2, *Serratia marcescens* : n = 1

# : *Staphylococcus haemolyticus* : n = 1

° : *Enterobacter cloaque* :  $n = 2$ , *Burkholderia spp* :  $n = 1$ , *Citrobacter Koseri* :  $n = 1$ , *Hafnia alvei* :  $n = 1$ ,  
*Klebsiella oxytoca* :  $n = 1$ , *Proteus mirabilis* :  $n = 1$
