# Supplementary material for: Clinical features and outcome of influenza pneumonia in critically-ill immunocompromised patients
Source: PubMed Central journal article supplement (PMC9750560; doi:10.1097/md.0000000000032245), 2022-12-09
Supplement: medi-101-e32245-s004.pdf [file medi-101-e32245-s004.pdf]

## Supplemental Digital Content

**e-Table 4: Mortality rate per year**

| <b>Year of ICU admission</b> | <b>All patients<br/>n (%)</b> | <b>Immunocompromised patients<br/>n (%)</b> | <b>ICU mortality<br/>n (%)</b> |
|------------------------------|-------------------------------|---------------------------------------------|--------------------------------|
| 2016                         | 6 (4.4%)                      | 3 (50%)                                     | 1 (16.7%)                      |
| 2017                         | 40 (29.2%)                    | 12 (30%)                                    | 4 (10%)                        |
| 2018                         | 48 (35%)                      | 16 (33.3%)                                  | 7 (14.6%)                      |
| 2019                         | 29 (21.2%)                    | 7 (24.1%)                                   | 6 (20.7%)                      |
| 2020                         | 14 (10.2%)                    | 5 (35.7%)                                   | 1 (7.1%)                       |
